# Supplementary material for: The controlled direct effect of temperament at 2-3 years on cognitive and academic outcomes at 6-7 years
Source: PubMed Central journal article supplement (PMC6548354; doi:10.1371/journal.pone.0204189), 2019-06-04
Supplement: pone.0204189.s003.pdf [file pone.0204189.s003.pdf]

## Supporting Information. S3 File.

The controlled direct effect of temperament at 2-3 years on cognitive and academic outcomes  
at 6-7 years

Shiau Yun Chong<sup>1</sup>, Catherine Ruth Chittleborough<sup>1,2</sup>, Tess Gregory<sup>1,3</sup>, John Lynch<sup>1,2,4</sup>,  
Murthy Mittinty<sup>1,2</sup>, Lisa Gaye Smithers<sup>1,2\*</sup>

<sup>1</sup> School of Public Health, University of Adelaide, Adelaide, Australia

<sup>2</sup> Robinson Research Institute, Adelaide, Australia

<sup>3</sup> Telethon Kids Institute, University of Western Australia, Perth, Australia

<sup>4</sup> Population Health Sciences, University of Bristol, Bristol, England, United Kingdom

\*Corresponding author

Email: [lisa.smithers@adelaide.edu.au](mailto:lisa.smithers@adelaide.edu.au) (LGS)

### S3 File. Sensitivity analysis for controlled direct effects

Sensitivity analyses were conducted to assess the effect of an unmeasured confounder,  $U$  of the association between  $X$  and  $Y$ , on the CDEs of the temperament subscale of reactivity on cognitive and academic outcomes. Assuming that  $U$  is a binary variable and the effect of  $U$  on  $Y$  on the additive scale, conditional on exposure, mediator, and covariates ( $X, M, C$ ) is the same for both exposure levels  $X=x$  and  $X=x^*$ , the bias for the conditional CDE is defined as [1]:

$$\text{Bias} \left( CDE_{x,x^*}(m) \right) = \delta\gamma \quad (1)$$

Where  $\delta$  denotes the difference in prevalence of  $U$  in the exposed,  $x$  and counterfactual,  $x^*$  group while  $\gamma$  denotes the effect size of  $U$  on cognitive and academic outcomes.

**Table S2** showed that to invalidate the observed CDE ( $\beta=-0.37$ ) of reactivity on the PPVT score, the unmeasured confounder  $U$  would need to have a difference in prevalence of 80% (for example 90% for exposure level  $x$ , and 10% for counterfactual exposure level  $x^*$ ) and would be required to decrease the PPVT score by at least 0.6.  $U$  might have an effect size of 0.6 on the PPVT score. However, it does not appear plausible for a  $U$  to have a prevalence difference of 0.8 or more that could eliminate the CDE of reactivity on PPVT.

**Table S2. The effect of a potential unmeasured binary confounder  $U$  of parenting practices to outcomes pathway**

| $P(U=1 x, m, c)^{(1)}$                                                                        | $P(U=1 x^*, m, c)^{(2)}$ | $\delta^{(1)-(2)}$ | $\gamma$ | $d=\delta\gamma$ |
|-----------------------------------------------------------------------------------------------|--------------------------|--------------------|----------|------------------|
| <b>Peabody Picture Vocabulary Test (direct effect of reactivity <math>\beta=-0.37</math>)</b> |                          |                    |          |                  |
| 0.6                                                                                           | 0.4                      | 0.2                | -0.40    | -0.08            |
| 0.7                                                                                           | 0.3                      | 0.4                | -0.40    | -0.16            |
| 0.8                                                                                           | 0.2                      | 0.6                | -0.40    | -0.24            |
| 0.9                                                                                           | 0.1                      | 0.8                | -0.40    | -0.32            |
| 0.6                                                                                           | 0.4                      | 0.2                | -0.60    | -0.12            |
| 0.7                                                                                           | 0.3                      | 0.4                | -0.60    | -0.24            |
| 0.8                                                                                           | 0.2                      | 0.6                | -0.60    | -0.36            |
| 0.9                                                                                           | 0.1                      | 0.8                | -0.60    | -0.48            |
| 0.6                                                                                           | 0.4                      | 0.2                | -0.80    | -0.16            |
| 0.7                                                                                           | 0.3                      | 0.4                | -0.80    | -0.32            |
| 0.8                                                                                           | 0.2                      | 0.6                | -0.80    | -0.48            |
| 0.9                                                                                           | 0.1                      | 0.8                | -0.80    | -0.64            |
| <b>Matrix Reasoning Test (direct effect of reactivity <math>\beta =-0.11</math>)</b>          |                          |                    |          |                  |
| 0.6                                                                                           | 0.4                      | 0.2                | -0.10    | -0.02            |
| 0.7                                                                                           | 0.3                      | 0.4                | -0.10    | -0.04            |
| 0.8                                                                                           | 0.2                      | 0.6                | -0.10    | -0.06            |
| 0.9                                                                                           | 0.1                      | 0.8                | -0.10    | -0.08            |
| 0.6                                                                                           | 0.4                      | 0.2                | -0.20    | -0.04            |
| 0.7                                                                                           | 0.3                      | 0.4                | -0.20    | -0.08            |
| 0.8                                                                                           | 0.2                      | 0.6                | -0.20    | -0.12            |
| 0.9                                                                                           | 0.1                      | 0.8                | -0.20    | -0.16            |
| 0.6                                                                                           | 0.4                      | 0.2                | -0.30    | -0.06            |
| 0.7                                                                                           | 0.3                      | 0.4                | -0.30    | -0.12            |
| 0.8                                                                                           | 0.2                      | 0.6                | -0.30    | -0.18            |
| 0.9                                                                                           | 0.1                      | 0.8                | -0.30    | -0.24            |
| <b>ARS-Literacy (direct effect of reactivity <math>\beta =-0.08</math>)</b>                   |                          |                    |          |                  |
| 0.6                                                                                           | 0.4                      | 0.2                | -0.05    | -0.01            |
| 0.7                                                                                           | 0.3                      | 0.4                | -0.05    | -0.02            |
| 0.8                                                                                           | 0.2                      | 0.6                | -0.05    | -0.03            |

|                                                                              |     |     |       |       |
|------------------------------------------------------------------------------|-----|-----|-------|-------|
| 0.9                                                                          | 0.1 | 0.8 | -0.05 | -0.04 |
| 0.6                                                                          | 0.4 | 0.2 | -0.10 | -0.02 |
| 0.7                                                                          | 0.3 | 0.4 | -0.10 | -0.04 |
| 0.8                                                                          | 0.2 | 0.6 | -0.10 | -0.06 |
| 0.9                                                                          | 0.1 | 0.8 | -0.10 | -0.08 |
| 0.6                                                                          | 0.4 | 0.2 | -0.15 | -0.03 |
| 0.7                                                                          | 0.3 | 0.4 | -0.15 | -0.06 |
| 0.8                                                                          | 0.2 | 0.6 | -0.15 | -0.09 |
| 0.9                                                                          | 0.1 | 0.8 | -0.15 | -0.12 |
| <b>ARS-Numeracy (direct effect of reactivity <math>\beta = -0.07</math>)</b> |     |     |       |       |
| 0.6                                                                          | 0.4 | 0.2 | -0.05 | -0.01 |
| 0.7                                                                          | 0.3 | 0.4 | -0.05 | -0.02 |
| 0.8                                                                          | 0.2 | 0.6 | -0.05 | -0.03 |
| 0.9                                                                          | 0.1 | 0.8 | -0.05 | -0.04 |
| 0.6                                                                          | 0.4 | 0.2 | -0.10 | -0.02 |
| 0.7                                                                          | 0.3 | 0.4 | -0.10 | -0.04 |
| 0.8                                                                          | 0.2 | 0.6 | -0.10 | -0.06 |
| 0.9                                                                          | 0.1 | 0.8 | -0.10 | -0.08 |

$P(U = 1|x, m, c)$  = prevalence of the unmeasured confounder for exposure level  $x$ ;  $P(U = 1|x^*, m, c)$  = prevalence of the unmeasured confounder for exposure level  $x^*$ .  $\delta$  = difference in the prevalence of the unmeasured confounder between exposure level  $x$  and  $x^*$ ;  $\gamma$  = beta coefficient of the direct effect of  $U$  on  $Y$ ;  $d$  = magnitude of bias, is the product of  $\delta$  and  $\gamma$ .

## Reference for S3 File

1. VanderWeele TJ. Bias formula for sensitivity analysis for direct and indirect effects. *Epidemiology* 2010;21(4):540-551.
